# Supplementary material for: Ambient Air and Hole Transport Layer Free Synthesis: Towards Low Cost CH3NH3PbI3Solar Cells
Source: Hindawi journal article supplement (doi:10.1155/2016/8947597), 2016-01-01
Supplement: f1 [file 8947597.f1.docx]

**Supplementary Information**

Fig S1:a) XRD of GO, b) SEM of exfoliated GO sheet


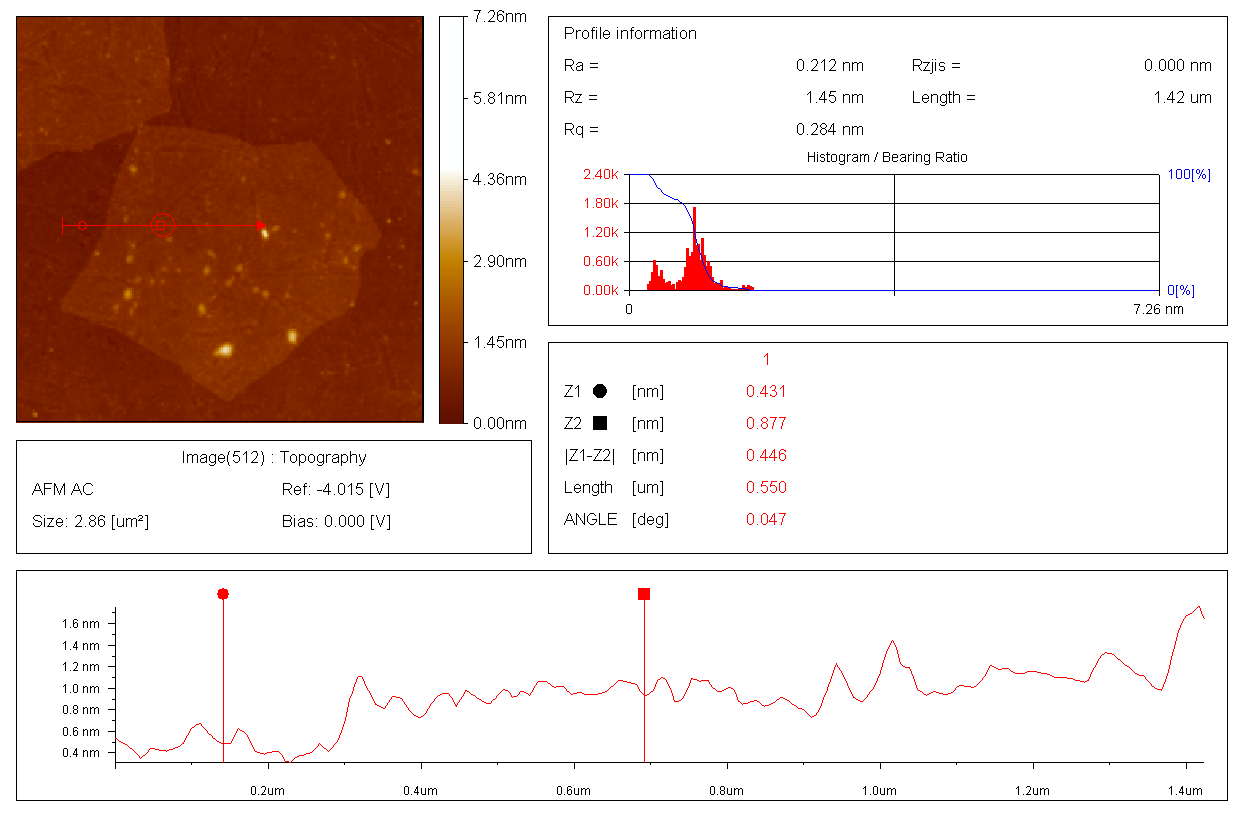


Fig S2: Roughness profile of GO sheet on AFM


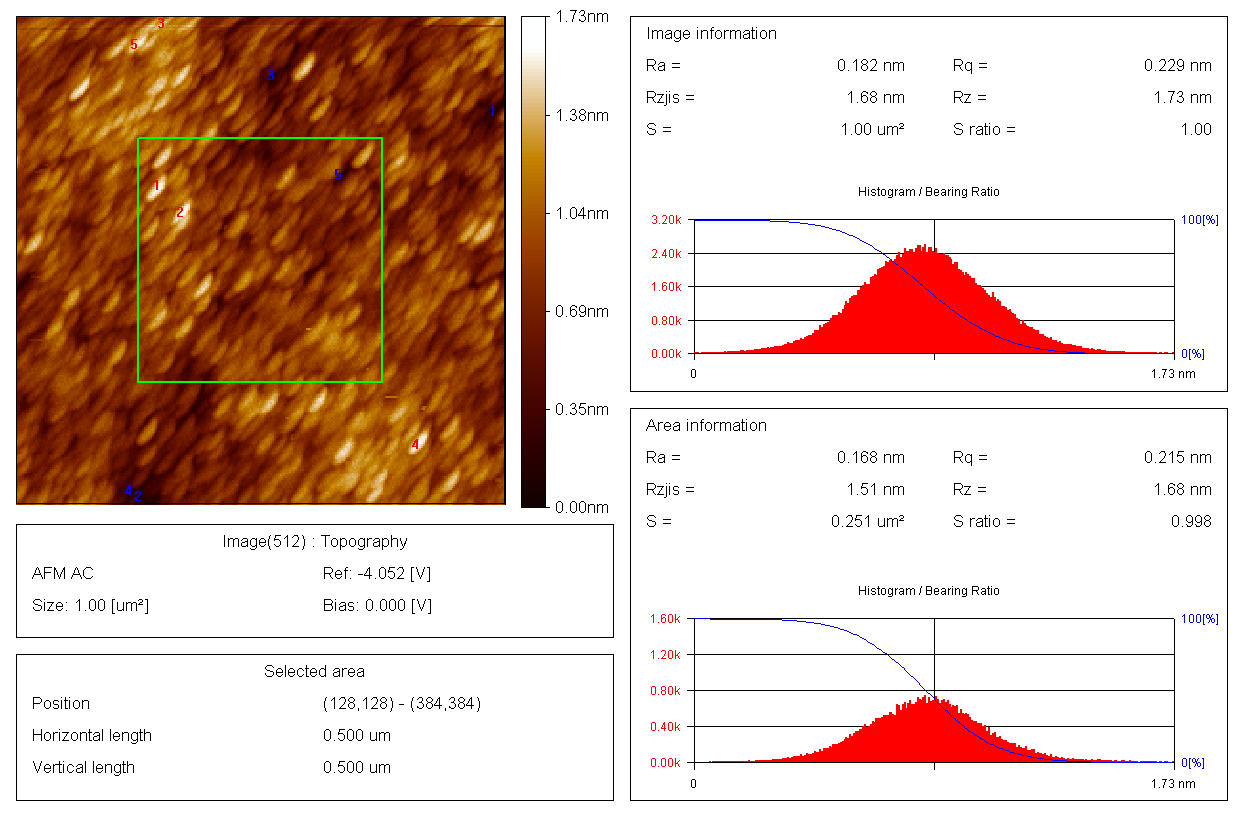


Fig S3: Roughness profile file of TiO2 film on AFM

Fig S4:SEM micrographs of titania GO composite prepared by dispersion of GO in as prepared titania sol


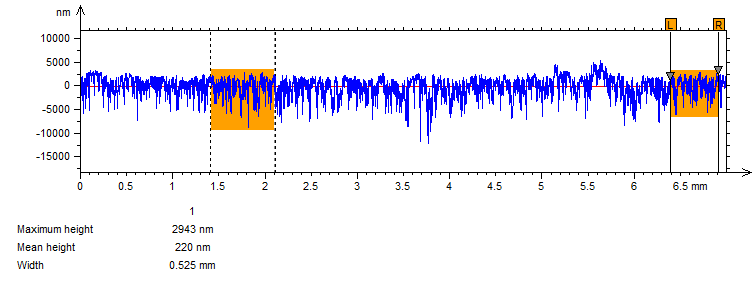


Fig S5: Thickness profile of titania thin film


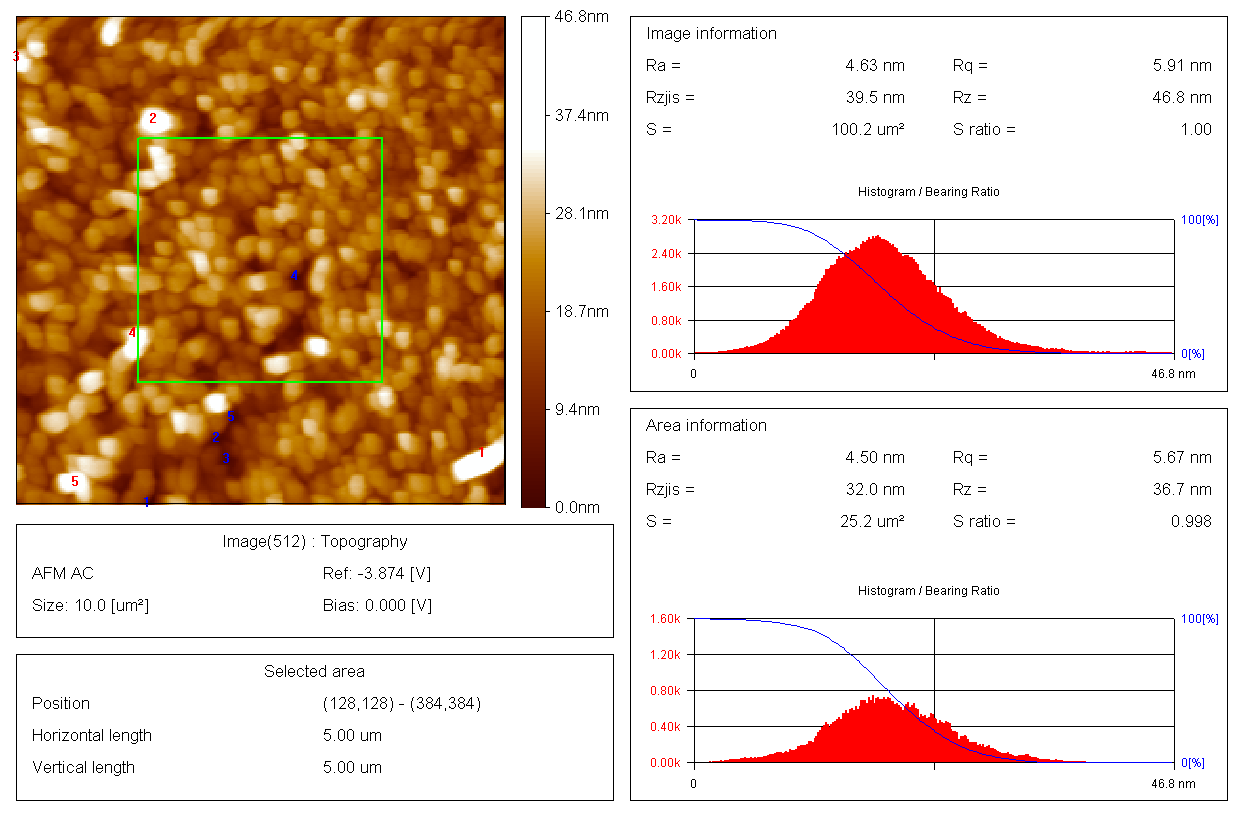


Fig S6: Roughness profile of lead iodide film


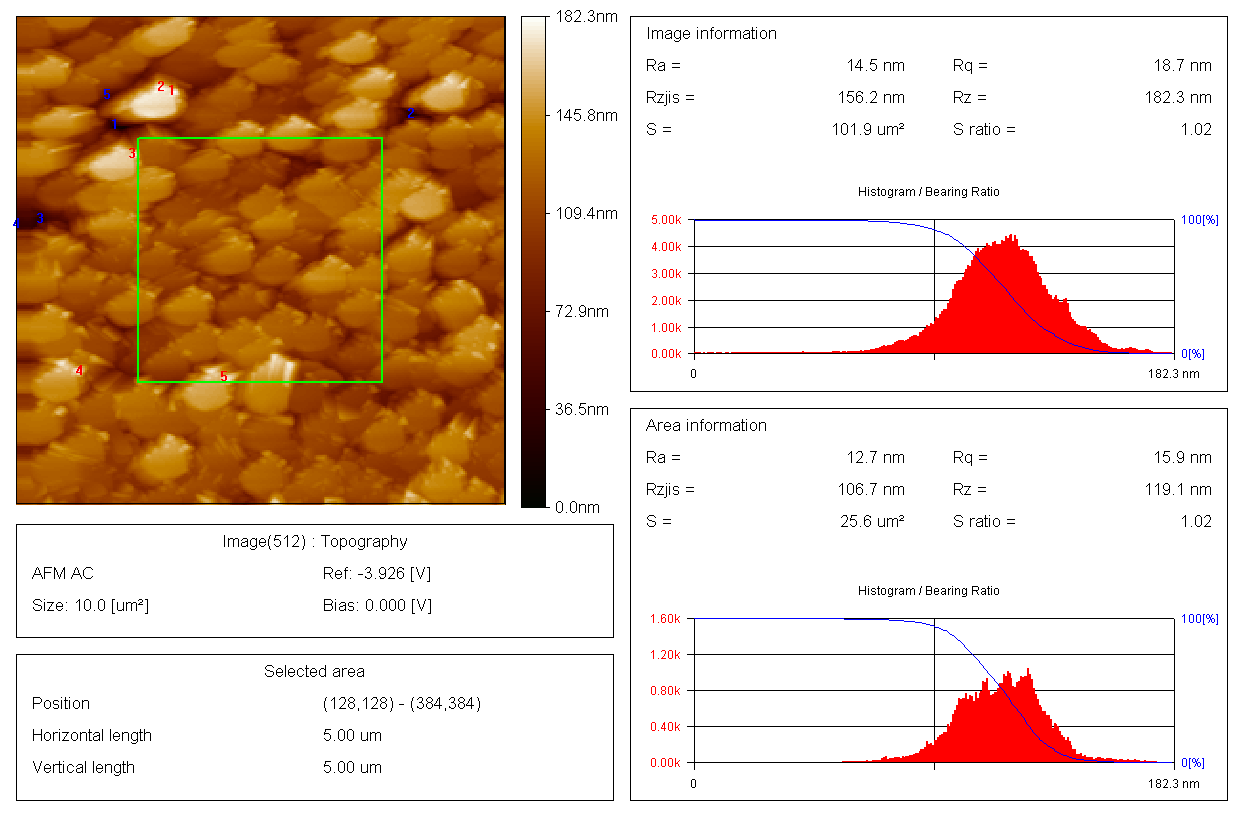


Fig S7: Roughness profile of CH3NH3PbI3 film

Fig S8: Low magnification and exploded view of CH3NH3PbI3. Modifications were made to the reported procedure to obtain large area uniform distribution of particles

| 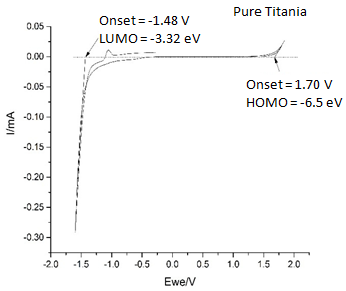 | 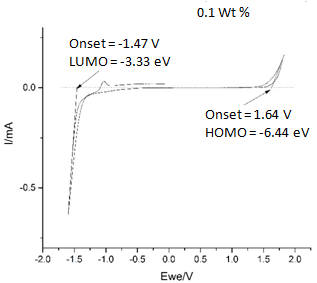 |
| --- | --- |
| 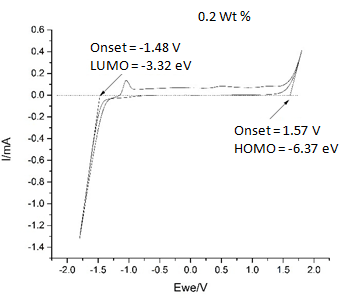 | 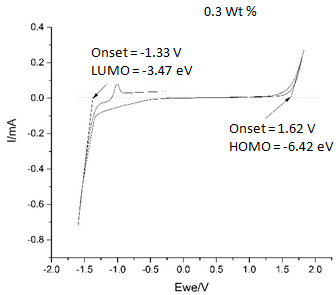 |
| 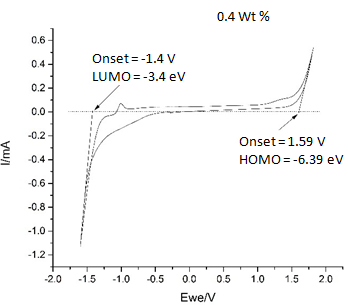 | |
| Fig S9: Band Gap calculation for TiO2 GO composite using CV | |
